# Supplementary material for: Lithium migration between blended cathodes of a lithium-ion battery
Source: Royal Society of Chemistry journal article supplement (doi:10.1039/c7ta02056b), 2017-01-01
Supplement: c7ta02056b1.pdf [file c7ta02056b1.pdf]

Electronic Supplementary Information for

**Lithium Migration between Blended Cathodes of Lithium-ion Battery**

T. Kobayashi,<sup>a\*</sup> Y. Kobayashi<sup>a</sup> and H. Miyashiro<sup>a</sup>

<sup>a</sup>Central Research Institute of Electric Power Industry (CRIEPI),  
2-6-1, Nagasaka, Yokosuka, 240-0196, Japan.

\* Corresponding author: Takeshi Kobayashi,

E-mail: [kobatake@criepi.denken.or.jp](mailto:kobatake@criepi.denken.or.jp), Tel: +81-46-856-2121

Charge-discharge curves of aluminum pouched cells

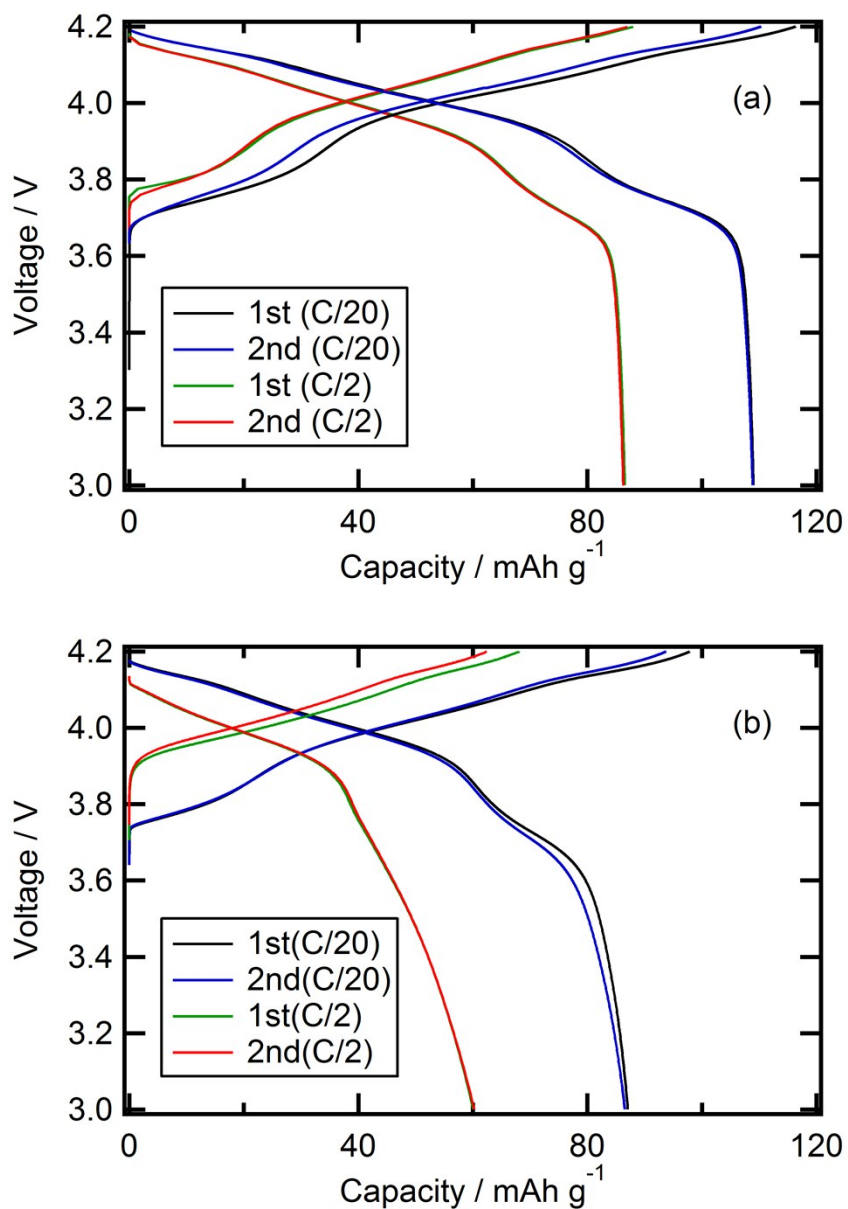

Figure S1. Charge-discharge curves of voltage versus capacity for blended cathode of (a) non-degraded state and (b) degraded state using aluminum pouched cells at 25°C. Every data of second cycles are used at C/20 and at C/2 for our manuscript.
